# Supplementary material
Source: publisher figshare collection journal article supplement (https://acs.figshare.com/ndownloader/files/17263802)

**Comparative protein expressions from obese and lean women at 0 and 24 months, as shown in Figure 1.**

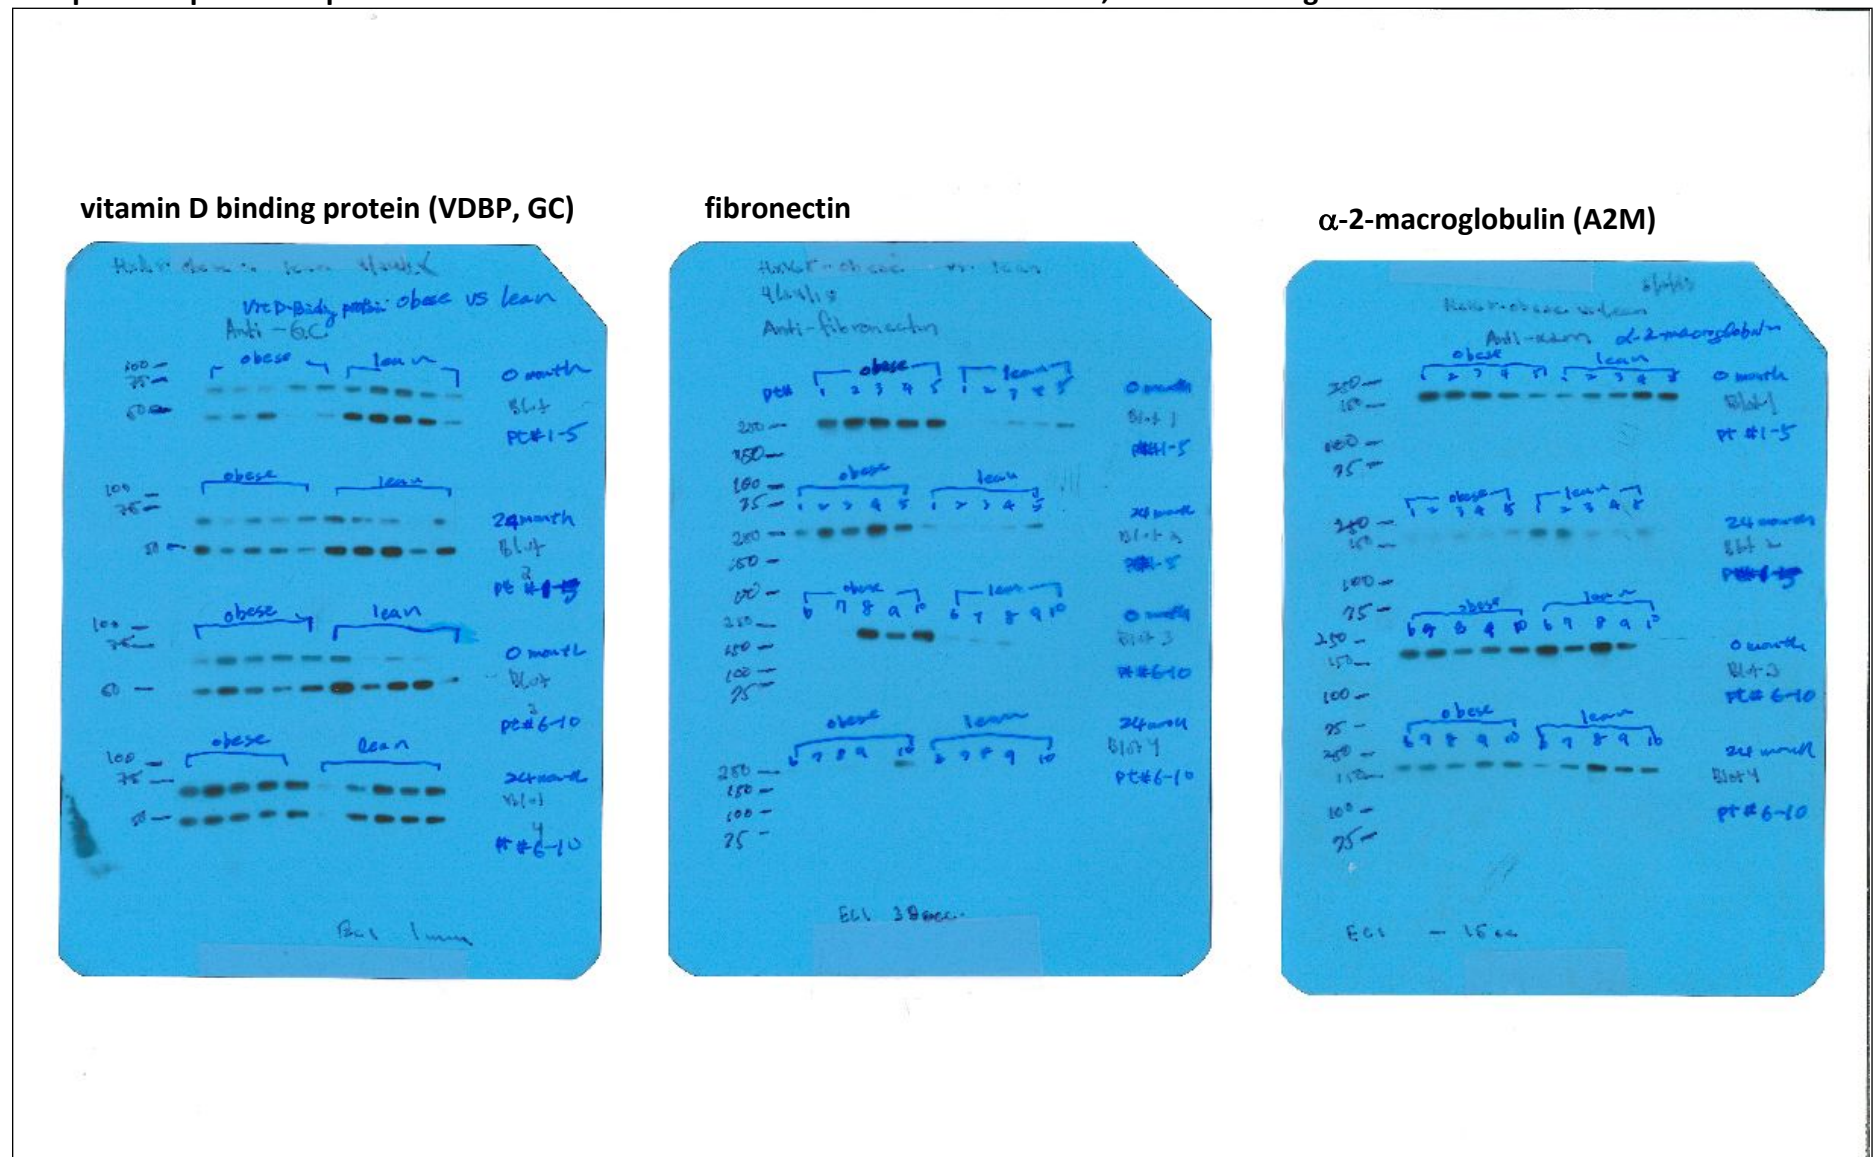

Comparative protein expressions in obese women between 0 and 24 months, as shown in Figure 2  
Bottom: L →; hemopexin

vitamin D binding protein

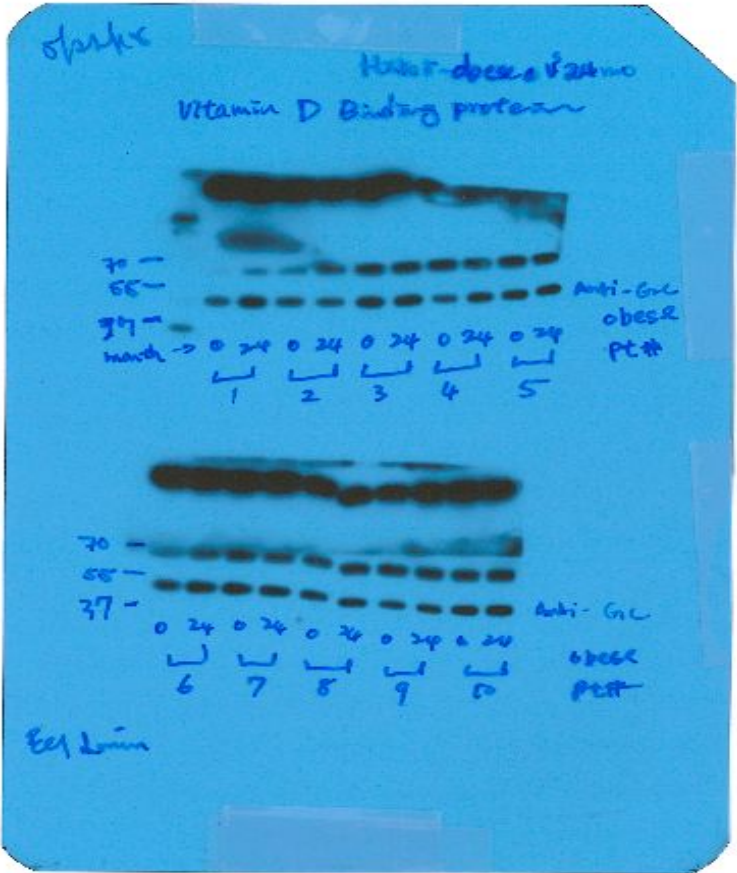

fibronectin

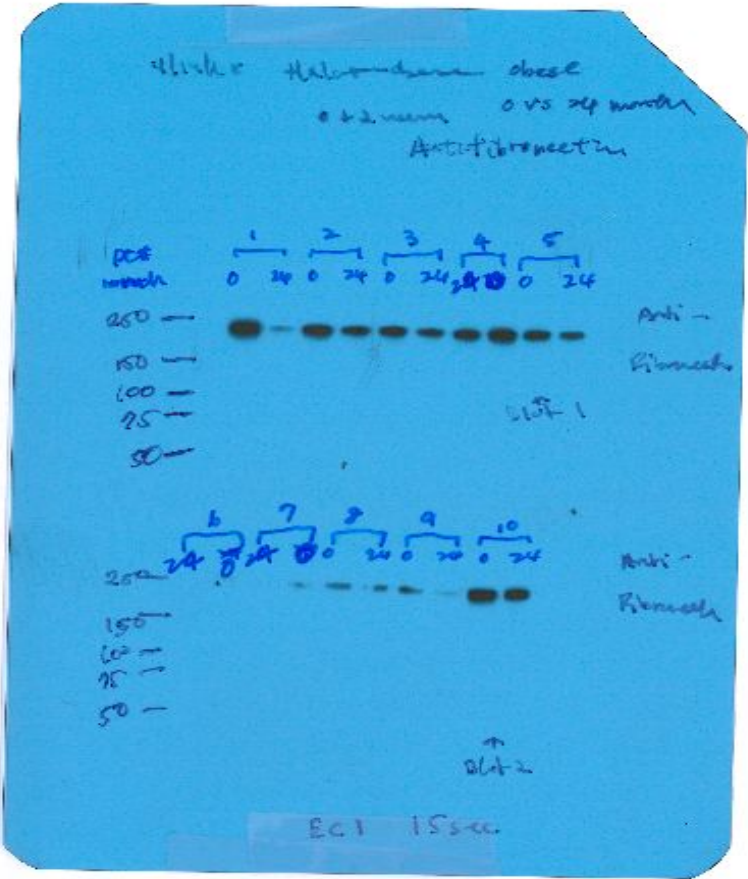

Comparative protein expressions in obese women between 0 and 24 months, as shown in Figure 2 continued.

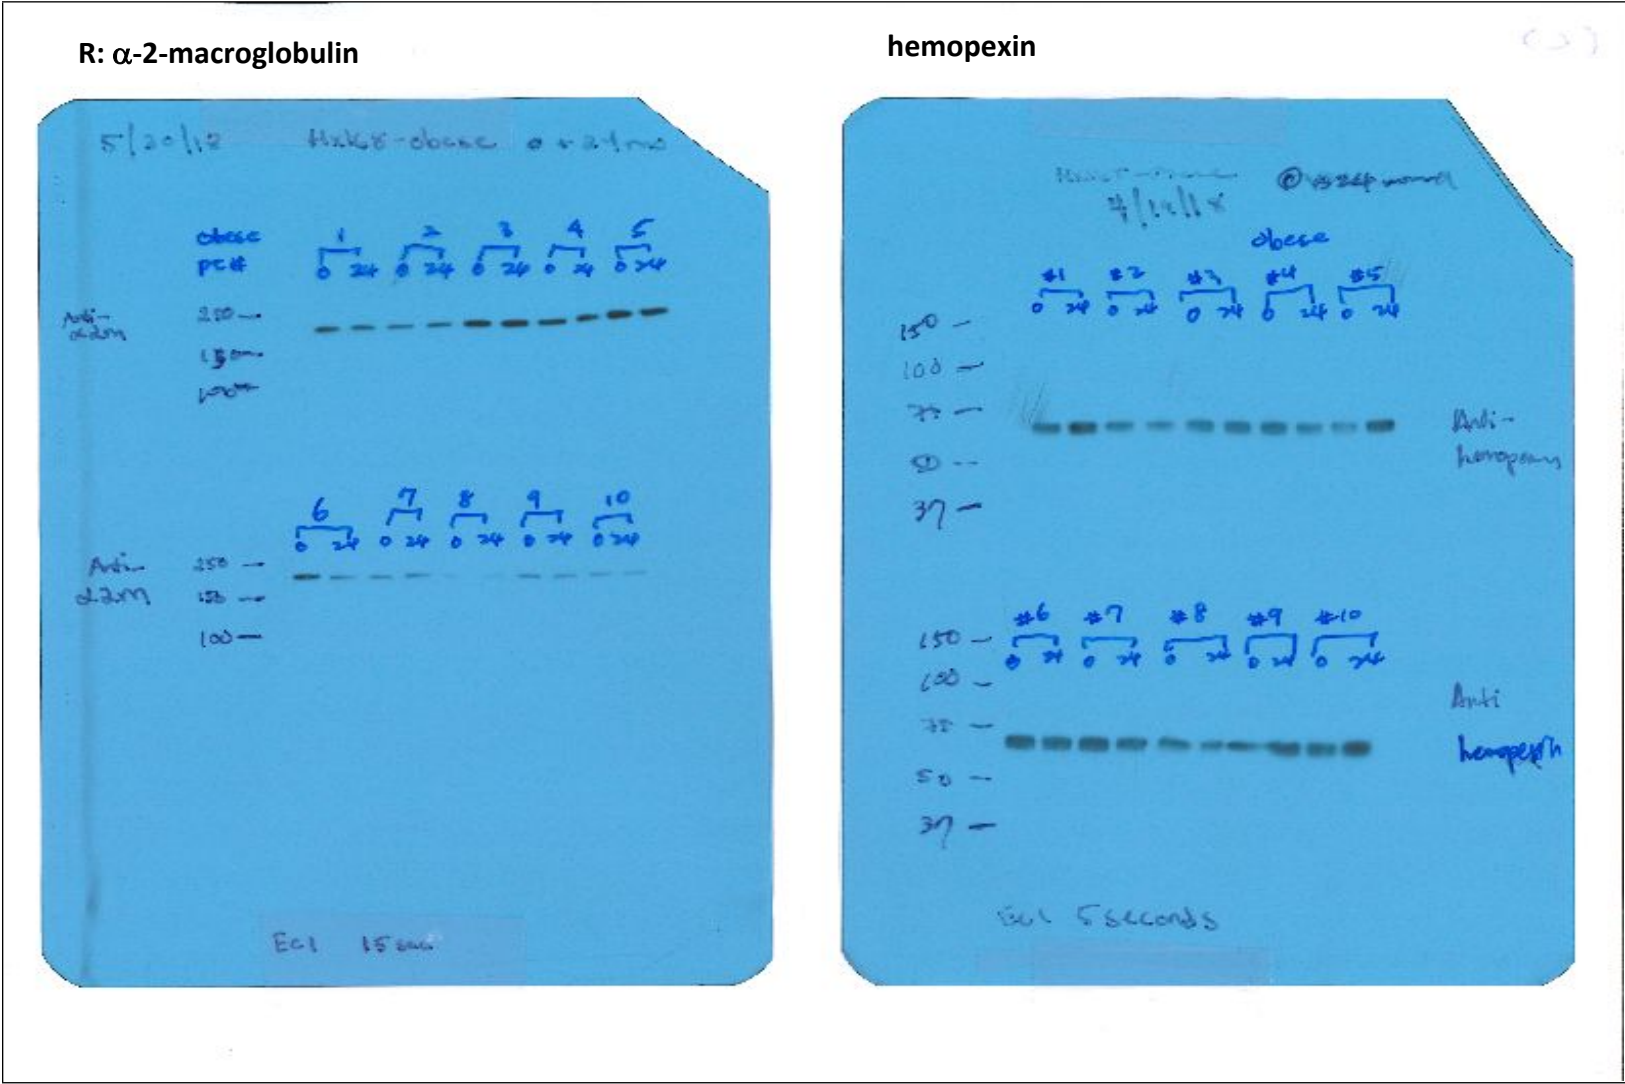



Comparative protein expressions between 0 and 24 months in obese and lean women, as shown in Figure 3

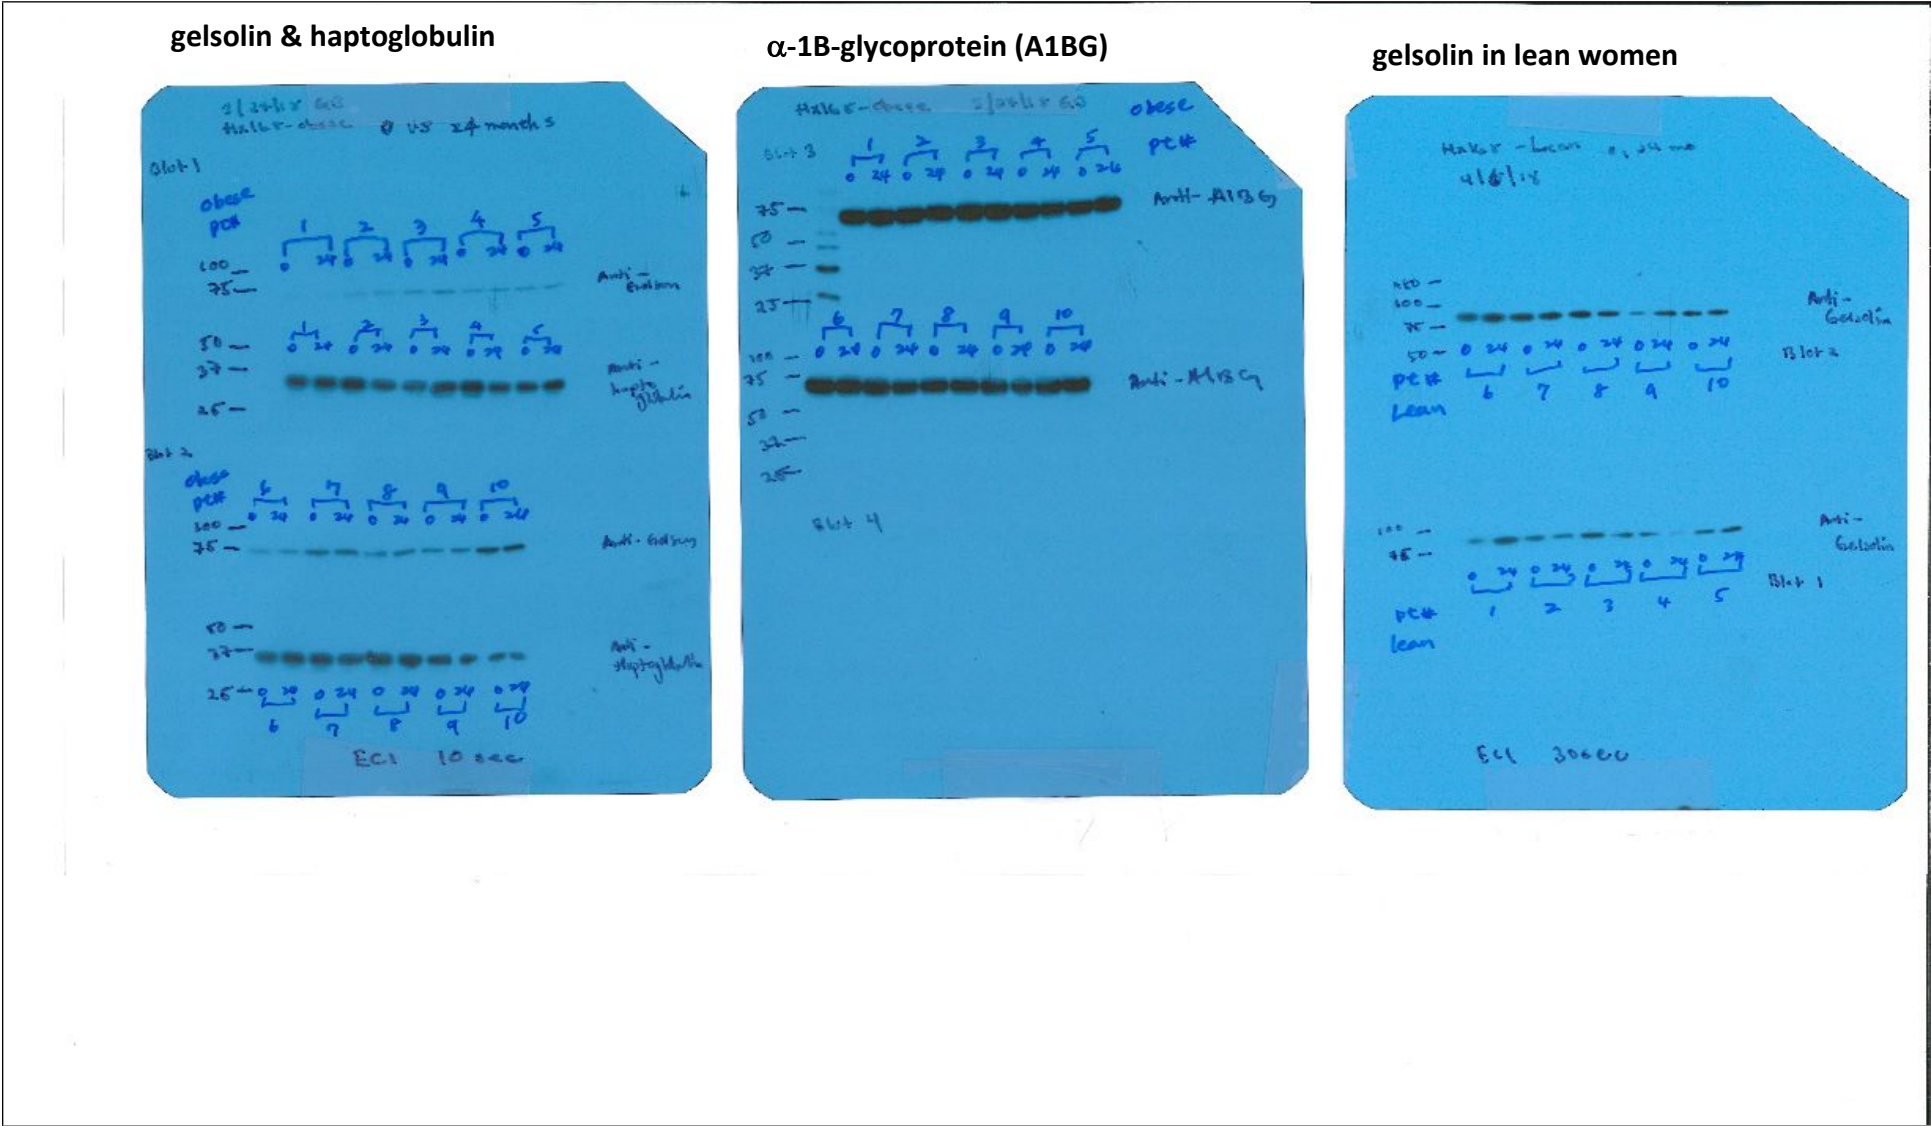

Comparative protein expressions between 0 and 24 months in obese and lean women, as shown in Figure 3 continued.

anti-inter- $\alpha$ -inhibitor H4 heavy chain (ITI4)

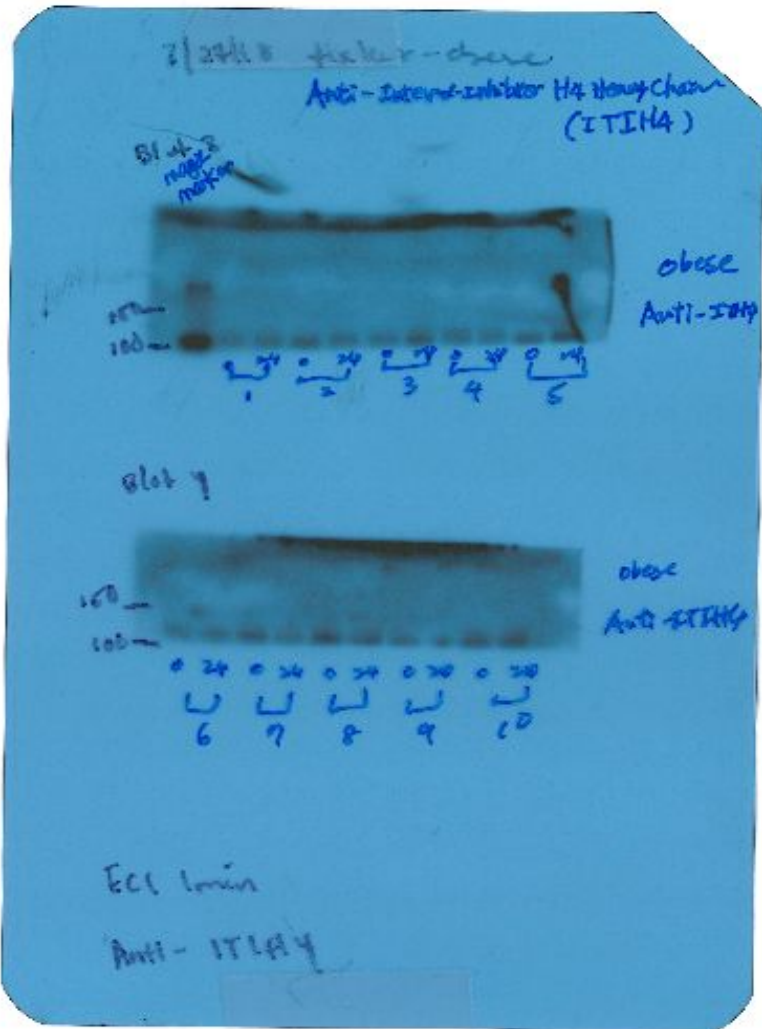

C reactive protein (CRP)

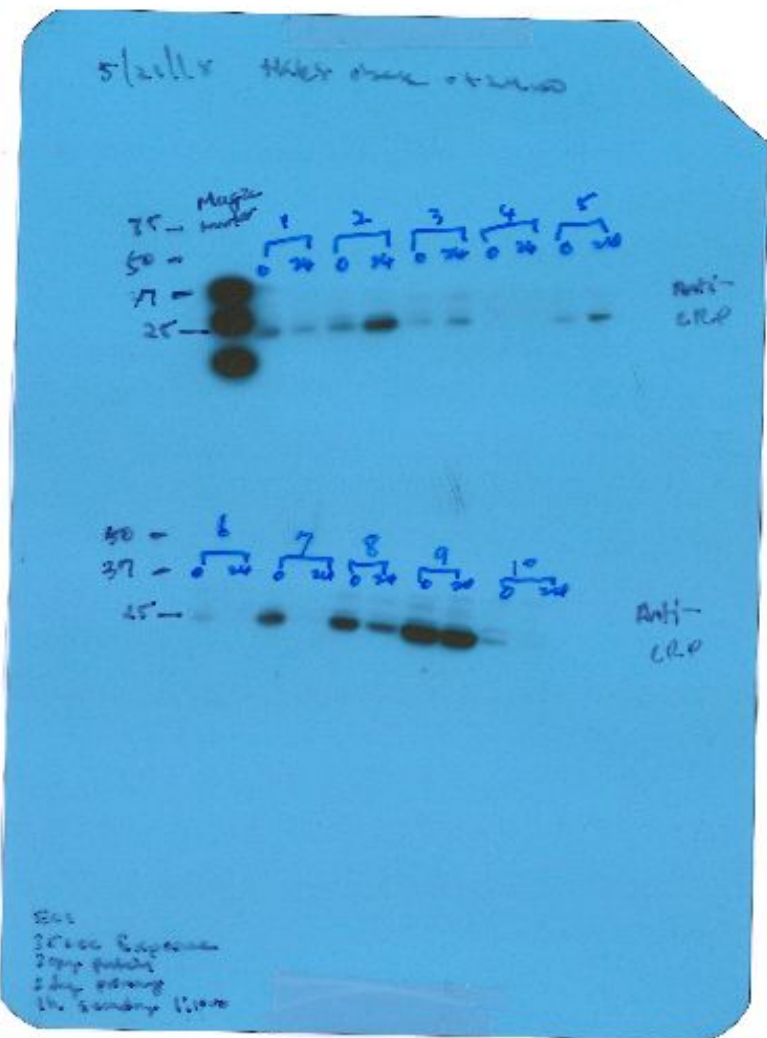

Supplement: Supplementary file 1 [file 17263802]
